# Supplementary material for: Biomarker-estimated flavan-3-ol intake is associated with lower blood pressure in cross-sectional analysis in EPIC Norfolk
Source: PubMed Central journal article supplement (PMC7578063; doi:10.1038/s41598-020-74863-7), 2020-10-21
Supplement: 41598_2020_74863_MOESM1_ESM.pdf [file 41598_2020_74863_MOESM1_ESM.pdf]

# Biomarker estimated flavan-3-ol intake is associated with lower blood pressure in cross-sectional analysis in EPIC Norfolk

## Supplemental material

Javier I. Ottaviani<sup>1</sup>, Abigail Britten<sup>2</sup>, Debora Lucarelli<sup>2</sup>, Robert Luben<sup>3</sup>, Angela A. Mulligan<sup>2</sup>, Marleen A. Lentjes<sup>4</sup>, Reedmond Fong<sup>5</sup>, Nicola Gray<sup>6</sup>, Philip B. Grace<sup>7</sup>, Deborah H. Mawson<sup>7</sup>, Amy Tym<sup>7</sup>, Antonia Wierzbicki<sup>7</sup>, Nita G. Forouhi<sup>2</sup>, Kay-Tee Khaw<sup>3</sup>, Hagen Schroeter<sup>1</sup>, Gunter G. C. Kuhnle<sup>6,\*</sup>

<sup>1</sup>Mars, Inc., McLean, VA; <sup>2</sup>MRC Epidemiology Unit, University of Cambridge, UK;

<sup>3</sup>Department of Public Health and Primary Care, University of Cambridge, UK; <sup>4</sup>School of Medical Sciences, Örebro University, Sweden; <sup>5</sup>Department of Nutrition, UC Davis, CA;

<sup>6</sup>Department of Food and Nutritional Sciences, University of Reading, UK; <sup>7</sup> LGC, Newmarket Road, Fordham, UK;

\*Corresponding author: Gunter G. C. Kuhnle; Department of Food & Nutritional Sciences, University of Reading, Reading RG6 6UR, UK. Telephone: +44 118 378 7723; Email:

[g.g.kuhnle@reading.ac.uk](mailto:g.g.kuhnle@reading.ac.uk)

## Study population

Supplementary Table 1: Baseline characteristics, disease incidence and mortality of 25,618 participants of EPIC Norfolk. Data show mean (SD) or absolute number and percentage and number of participants with missing data.

|                                            | Overall         | Missing | Complete        | Men             | Women           |
|--------------------------------------------|-----------------|---------|-----------------|-----------------|-----------------|
| n                                          | 25618           |         | 18466           | 11592           | 14026           |
| Age [years]                                | 58.74 (9.32)    | 0       | 58.78 (9.03)    | 59.13 (9.31)    | 58.42 (9.31)    |
| BMI [kg/m <sup>2</sup> ]                   | 26.36 (3.92)    | 57      | 26.24 (3.77)    | 26.53 (3.31)    | 26.23 (4.35)    |
| Sex [Female]                               | 14026 (54.8)    | 0       | 10017 (54.2)    | —               | 14026 (100.0)   |
| Physical activity                          |                 | 1       |                 |                 |                 |
| Inactive                                   | 7853 (30.7)     |         | 5457 (29.6)     | 3579 (30.9)     | 4274 (30.5)     |
| Moderately Inactive                        | 7344 (28.7)     |         | 5322 (28.8)     | 2853 (24.6)     | 4491 (32.0)     |
| Moderately Active                          | 5773 (22.5)     |         | 4273 (23.1)     | 2657 (22.9)     | 3116 (22.2)     |
| Active                                     | 4647 (18.1)     |         | 3414 (18.5)     | 2502 (21.6)     | 2145 (15.3)     |
| Smoking status                             |                 | 220     |                 |                 |                 |
| Current                                    | 2979 (11.7)     |         | 2091 (11.3)     | 1402 (12.2)     | 1577 (11.4)     |
| Former                                     | 10751 (42.3)    |         | 7814 (42.3)     | 6276 (54.5)     | 4475 (32.2)     |
| Never                                      | 11668 (45.9)    |         | 8561 (46.4)     | 3833 (33.3)     | 7835 (56.4)     |
| Systolic BP [mmHg]                         | 135.49 (18.46)  | 60      | 135.53 (18.24)  | 137.41 (17.69)  | 133.91 (18.93)  |
| Diastolic BP [mmHg]                        | 82.54 (11.28)   | 60      | 82.51 (11.18)   | 84.40 (11.13)   | 81.00 (11.16)   |
| Total Cholesterol [mmol/L]                 | 6.18 (1.17)     | 1765    | 6.19 (1.16)     | 6.04 (1.10)     | 6.30 (1.21)     |
| LDL [mmol/L]                               | 1.42 (0.43)     | 2562    | 1.42 (0.43)     | 1.23 (0.33)     | 1.57 (0.43)     |
| HDL [mmol/L]                               | 3.97 (1.04)     | 2561    | 3.97 (1.03)     | 3.92 (0.96)     | 4.01 (1.09)     |
| Triglycerides [mmol/L]                     | 1.82 (1.10)     | 1767    | 1.81 (1.10)     | 2.05 (1.22)     | 1.62 (0.96)     |
| cRP                                        | 3.09 (6.27)     | 7188    | 3.00 (5.98)     | 3.02 (5.92)     | 3.15 (6.54)     |
| Social class                               |                 | 488     |                 |                 |                 |
| Unclassified                               | 82 (0.3)        |         | 52 (0.3)        | 33 (0.3)        | 49 (0.4)        |
| A                                          | 1750 (7.0)      |         | 1282 (6.9)      | 872 (7.6)       | 878 (6.4)       |
| B                                          | 9152 (36.4)     |         | 6758 (36.6)     | 4353 (38.1)     | 4799 (35.0)     |
| C1D                                        | 4138 (16.5)     |         | 3042 (16.5)     | 1424 (12.5)     | 2714 (19.8)     |
| C2D                                        | 5767 (22.9)     |         | 4236 (22.9)     | 2881 (25.2)     | 2886 (21.0)     |
| E                                          | 3356 (13.4)     |         | 2469 (13.4)     | 1519 (13.3)     | 1837 (13.4)     |
| F                                          | 885 (3.5)       |         | 627 (3.4)       | 337 (3.0)       | 548 (4.0)       |
| Plasma Vitamin C [µmol/L]                  | 53.34 (20.37)   | 3161    | 53.29 (20.13)   | 47.07 (18.91)   | 58.61 (20.05)   |
| Medication                                 |                 |         |                 |                 |                 |
| Lipid-lowering                             | 377 (1.5)       | 0       | 265 (1.4)       | 173 (1.5)       | 204 (1.5)       |
| Anti-hypertensive                          | 4798 (18.7)     | 0       | 3422 (18.5)     | 2165 (18.7)     | 2633 (18.8)     |
| Participants free from disease at baseline |                 |         |                 |                 |                 |
| Diabetes                                   | 25018 (97.7)    | 19      | 18055 (97.8)    | 11222 (96.9)    | 13796 (98.4)    |
| MI                                         | 24801 (96.9)    | 22      | 17881 (96.8)    | 10966 (94.7)    | 13835 (98.7)    |
| CVA                                        | 25251 (98.6)    | 17      | 18224 (98.7)    | 11377 (98.2)    | 13874 (99.0)    |
| Family history of MI                       | 16280 (63.6)    | 24      | 11743 (63.6)    | 7466 (64.5)     | 8814 (62.9)     |
| Tea intake (7DD) [g/d]                     | 772.48 (530.58) | 132     | 777.12 (525.95) | 802.69 (556.57) | 747.56 (506.81) |
| Coffee intake (7DD) [g/d]                  | 385.53 (410.93) | 132     | 394.78 (411.68) | 394.20 (423.18) | 378.38 (400.41) |
| Menopausal status                          |                 | 15      |                 |                 |                 |

|                                       |              |             |              |               |              |
|---------------------------------------|--------------|-------------|--------------|---------------|--------------|
| Pre-menopausal                        | 2349 (16.8)  | 1594 (15.9) | —            | 2349 (16.8)   |              |
| Peri-menopausal (< 1year)             | 760 (5.4)    | 553 (5.5)   | —            | 760 (5.4)     |              |
| Peri-menopausal (1-5 years)           | 2510 (17.9)  | 1864 (18.6) | —            | 2510 (17.9)   |              |
| Post-menopausal                       | 8392 (59.9)  | 6003 (59.9) | —            | 8392 (59.9)   |              |
| Hormone replacement therapy           |              | 15          |              |               |              |
| Current                               | 2847 (20.3)  | 2100 (21.0) | —            | 2847 (20.3)   |              |
| Former                                | 1590 (11.3)  | 1127 (11.3) | —            | 1590 (11.3)   |              |
| Never                                 | 9574 (68.3)  | 6787 (67.8) | —            | 9574 (68.3)   |              |
| Biomarker                             |              |             |              |               |              |
| gVLM [ $\mu\text{mol/L}$ ]            | 9.51 (15.98) | 1466        | 9.63 (16.21) | 10.48 (16.51) | 8.71 (15.49) |
| gVLM (adjusted by specific gravity)   | 9.32 (15.69) | 3779        | 9.45 (15.87) | 10.20 (16.17) | 8.59 (15.25) |
| SREM [ $\mu\text{mol/L}$ ]            | 1.97 (3.01)  | 1326        | 1.93 (2.95)  | 2.15 (3.01)   | 1.82 (3.00)  |
| SREM (adjusted by specific gravity)   | 1.90 (2.92)  | 3655        | 1.89 (2.88)  | 2.08 (2.91)   | 1.76 (2.92)  |
| Specific gravity                      | 1.02 (0.01)  | 2838        | 1.02 (0.01)  | 1.02 (0.01)   | 1.02 (0.01)  |
| Disease incidence at end of follow-up |              | 0           |              |               |              |
| CVD                                   | 13969 (54.5) |             | 10044 (54.4) | 6907 (59.6)   | 7062 (50.3)  |
| Mortality at end of follow-up         |              | 0           |              |               |              |
| All cause                             | 8030 (31.3)  |             | 5633 (30.5)  | 4277 (36.9)   | 3753 (26.8)  |
| CVD                                   | 2613 (10.2)  |             | 1807 (9.8)   | 1474 (12.7)   | 1139 (8.1)   |
| IHD                                   | 1278 (5.0)   |             | 869 (4.7)    | 858 (7.4)     | 420 (3.0)    |
| MI                                    | 492 (1.9)    |             | 328 (1.8)    | 319 (2.8)     | 173 (1.2)    |

1  
2  
Supplementary Table 2: Baseline characteristics of 25,618 participants of EPIC Norfolk and number of missing data, stratified by biomarker concentration. Data show mean (SD) or absolute number and percentage. Differences between centiles were tested by ANOVA (continuous data) or chi2-test.

| Centiles                                        | 0-10           | 10-25          | 25-50          | 50-75          | 75-90          | 90-100         | p      |
|-------------------------------------------------|----------------|----------------|----------------|----------------|----------------|----------------|--------|
| Biomarker range (log <sub>2</sub> -transformed) | -9.795,-2.505  | -2.505,-0.288  | -0.288, 1.673  | 1.673, 3.351   | 3.351, 4.677   | 4.677, 6.907   |        |
| n                                               | 2183           | 3276           | 5460           | 5459           | 3277           | 2183           |        |
| Sex [Female]                                    | 1367 (62.6)    | 1966 (60.0)    | 3063 (56.1)    | 2892 (53.0)    | 1617 (49.3)    | 1084 (49.7)    | <0.001 |
| Age [years]                                     | 58.49 (8.90)   | 59.17 (8.91)   | 59.24 (9.13)   | 59.24 (9.05)   | 58.69 (9.26)   | 58.08 (9.25)   | <0.001 |
| BMI [kg/m <sup>2</sup> ]                        | 26.03 (3.80)   | 26.06 (3.85)   | 26.34 (3.84)   | 26.37 (3.88)   | 26.56 (3.91)   | 26.61 (3.98)   | <0.001 |
| Physical activity                               |                |                |                |                |                |                | 0.108  |
| Inactive                                        | 635 (29.1)     | 1005 (30.7)    | 1708 (31.3)    | 1646 (30.2)    | 1015 (31.0)    | 655 (30.0)     |        |
| Moderately Inactive                             | 655 (30.0)     | 972 (29.7)     | 1598 (29.3)    | 1539 (28.2)    | 899 (27.4)     | 605 (27.7)     |        |
| Moderately Active                               | 510 (23.4)     | 746 (22.8)     | 1211 (22.2)    | 1258 (23.0)    | 742 (22.6)     | 488 (22.4)     |        |
| Active                                          | 383 (17.5)     | 553 (16.9)     | 943 (17.3)     | 1016 (18.6)    | 621 (19.0)     | 435 (19.9)     |        |
| Smoking status                                  |                |                |                |                |                |                | <0.001 |
| Current                                         | 288 (13.3)     | 347 (10.7)     | 586 (10.8)     | 616 (11.4)     | 416 (12.8)     | 278 (12.8)     |        |
| Former                                          | 854 (39.4)     | 1311 (40.4)    | 2245 (41.4)    | 2309 (42.7)    | 1439 (44.3)    | 983 (45.3)     |        |
| Never                                           | 1027 (47.3)    | 1587 (48.9)    | 2586 (47.7)    | 2483 (45.9)    | 1391 (42.9)    | 911 (41.9)     |        |
| Systolic BP [mmHg]                              | 136.77 (19.09) | 136.29 (18.94) | 135.90 (18.58) | 136.38 (18.46) | 135.26 (18.01) | 133.62 (17.30) | <0.001 |
| Diastolic BP [mmHg]                             | 83.30 (11.44)  | 82.80 (11.51)  | 82.70 (11.22)  | 82.92 (11.40)  | 82.26 (10.98)  | 81.77 (11.05)  | <0.001 |
| Total Cholesterol [mmol/L]                      | 6.24 (1.21)    | 6.24 (1.15)    | 6.23 (1.18)    | 6.19 (1.16)    | 6.14 (1.14)    | 6.12 (1.16)    | <0.001 |
| LDL [mmol/L]                                    | 1.48 (0.43)    | 1.45 (0.42)    | 1.42 (0.41)    | 1.42 (0.45)    | 1.38 (0.40)    | 1.40 (0.42)    | <0.001 |
| HDL [mmol/L]                                    | 4.01 (1.07)    | 4.03 (1.03)    | 4.01 (1.04)    | 3.95 (1.03)    | 3.93 (1.03)    | 3.89 (1.00)    | <0.001 |
| Triglycerides [mmol/L]                          | 1.70 (1.19)    | 1.71 (0.98)    | 1.81 (1.07)    | 1.86 (1.16)    | 1.89 (1.07)    | 1.87 (1.12)    | <0.001 |
| cRP                                             | 3.12 (6.67)    | 2.92 (6.27)    | 3.03 (6.06)    | 3.04 (5.58)    | 3.18 (7.00)    | 2.89 (4.36)    | 0.596  |
| Social class                                    |                |                |                |                |                |                | <0.001 |
| Unclassified                                    | 6 (0.3)        | 14 (0.4)       | 11 (0.2)       | 12 (0.2)       | 16 (0.5)       | 4 (0.2)        |        |
| A                                               | 191 (8.9)      | 231 (7.2)      | 398 (7.4)      | 342 (6.4)      | 202 (6.3)      | 125 (5.8)      |        |

|                                        |                 |                 |                 |                 |                 |                 |        |
|----------------------------------------|-----------------|-----------------|-----------------|-----------------|-----------------|-----------------|--------|
| B                                      | 800 (37.2)      | 1204 (37.6)     | 1929 (36.0)     | 1904 (35.6)     | 1170 (36.4)     | 773 (36.0)      |        |
| C1D                                    | 379 (17.6)      | 549 (17.1)      | 890 (16.6)      | 866 (16.2)      | 510 (15.9)      | 339 (15.8)      |        |
| C2D                                    | 457 (21.2)      | 716 (22.4)      | 1227 (22.9)     | 1246 (23.3)     | 757 (23.5)      | 526 (24.5)      |        |
| E                                      | 269 (12.5)      | 386 (12.1)      | 711 (13.3)      | 773 (14.4)      | 439 (13.6)      | 305 (14.2)      |        |
| F                                      | 51 (2.4)        | 102 (3.2)       | 188 (3.5)       | 209 (3.9)       | 123 (3.8)       | 78 (3.6)        |        |
| Plasma Vitamin C [ $\mu\text{mol/L}$ ] | 55.48 (21.43)   | 54.09 (20.33)   | 53.52 (20.34)   | 52.82 (19.91)   | 51.76 (19.95)   | 52.02 (19.38)   | <0.001 |
| Tea intake (7DD) [g/d]                 | 640.34 (524.62) | 734.64 (544.88) | 779.40 (524.49) | 807.05 (525.18) | 820.27 (511.60) | 813.27 (514.15) | <0.001 |
| Coffee intake (7DD) [g/d]              | 521.48 (516.12) | 426.34 (424.40) | 390.61 (403.83) | 365.46 (385.62) | 350.70 (369.21) | 336.45 (377.92) | <0.001 |
| gVLM [ $\mu\text{mol/L}$ ]             | 0.06 (0.06)     | 0.47 (0.19)     | 1.83 (0.69)     | 6.11 (2.03)     | 16.48 (4.43)    | 49.68 (21.30)   | <0.001 |
| gVLM (adjusted by specific gravity)    | 0.06 (0.06)     | 0.47 (0.19)     | 1.80 (0.68)     | 6.01 (1.99)     | 16.17 (4.34)    | 48.66 (20.83)   | <0.001 |
| SREM [ $\mu\text{mol/L}$ ]             | 0.62 (1.24)     | 1.01 (1.84)     | 1.45 (2.25)     | 1.97 (2.76)     | 2.83 (3.51)     | 4.21 (4.41)     | <0.001 |
| SREM (adjusted by specific gravity)    | 0.61 (1.22)     | 1.00 (1.80)     | 1.42 (2.21)     | 1.93 (2.70)     | 2.77 (3.43)     | 4.12 (4.31)     | <0.001 |
| <b>SREM concentration</b>              |                 |                 |                 |                 |                 |                 |        |
| Biomarker range (log-transformed)      | -9.795,-2.505   | -2.505,-0.288   | -0.288, 1.673   | 1.673, 3.351    | 3.351, 4.677    | 4.677, 6.907    | p      |
| n                                      | 2183            | 3276            | 5460            | 5459            | 3277            | 2183            |        |
| Sex [Female]                           | 1367 (62.6)     | 1966 (60.0)     | 3063 (56.1)     | 2892 (53.0)     | 1617 (49.3)     | 1084 (49.7)     | <0.001 |
| Age [years]                            | 58.49 (8.90)    | 59.17 (8.91)    | 59.24 (9.13)    | 59.24 (9.05)    | 58.69 (9.26)    | 58.08 (9.25)    | <0.001 |
| BMI [kg/m <sup>2</sup> ]               | 26.03 (3.80)    | 26.06 (3.85)    | 26.34 (3.84)    | 26.37 (3.88)    | 26.56 (3.91)    | 26.61 (3.98)    | <0.001 |
| Physical activity                      |                 |                 |                 |                 |                 |                 | 0.108  |
| Inactive                               | 635 (29.1)      | 1005 (30.7)     | 1708 (31.3)     | 1646 (30.2)     | 1015 (31.0)     | 655 (30.0)      |        |
| Moderately Inactive                    | 655 (30.0)      | 972 (29.7)      | 1598 (29.3)     | 1539 (28.2)     | 899 (27.4)      | 605 (27.7)      |        |
| Moderately Active                      | 510 (23.4)      | 746 (22.8)      | 1211 (22.2)     | 1258 (23.0)     | 742 (22.6)      | 488 (22.4)      |        |
| Active                                 | 383 (17.5)      | 553 (16.9)      | 943 (17.3)      | 1016 (18.6)     | 621 (19.0)      | 435 (19.9)      |        |
| Smoking status                         |                 |                 |                 |                 |                 |                 | <0.001 |
| Current                                | 288 (13.3)      | 347 (10.7)      | 586 (10.8)      | 616 (11.4)      | 416 (12.8)      | 278 (12.8)      |        |
| Former                                 | 854 (39.4)      | 1311 (40.4)     | 2245 (41.4)     | 2309 (42.7)     | 1439 (44.3)     | 983 (45.3)      |        |

| Never                               | 1027 (47.3)     | 1587 (48.9)     | 2586 (47.7)     | 2483 (45.9)     | 1391 (42.9)     | 911 (41.9)      |        |
|-------------------------------------|-----------------|-----------------|-----------------|-----------------|-----------------|-----------------|--------|
| Systolic BP [mmHg]                  | 136.77 (19.09)  | 136.29 (18.94)  | 135.90 (18.58)  | 136.38 (18.46)  | 135.26 (18.01)  | 133.62 (17.30)  | <0.001 |
| Diastolic BP [mmHg]                 | 83.30 (11.44)   | 82.80 (11.51)   | 82.70 (11.22)   | 82.92 (11.40)   | 82.26 (10.98)   | 81.77 (11.05)   | <0.001 |
| Total Cholesterol [mmol/L]          | 6.24 (1.21)     | 6.24 (1.15)     | 6.23 (1.18)     | 6.19 (1.16)     | 6.14 (1.14)     | 6.12 (1.16)     | <0.001 |
| LDL [mmol/L]                        | 1.48 (0.43)     | 1.45 (0.42)     | 1.42 (0.41)     | 1.42 (0.45)     | 1.38 (0.40)     | 1.40 (0.42)     | <0.001 |
| HDL [mmol/L]                        | 4.01 (1.07)     | 4.03 (1.03)     | 4.01 (1.04)     | 3.95 (1.03)     | 3.93 (1.03)     | 3.89 (1.00)     | <0.001 |
| Triglycerides [mmol/L]              | 1.70 (1.19)     | 1.71 (0.98)     | 1.81 (1.07)     | 1.86 (1.16)     | 1.89 (1.07)     | 1.87 (1.12)     | <0.001 |
| cRP                                 | 3.12 (6.67)     | 2.92 (6.27)     | 3.03 (6.06)     | 3.04 (5.58)     | 3.18 (7.00)     | 2.89 (4.36)     | 0.596  |
| Social class                        |                 |                 |                 |                 |                 |                 | <0.001 |
| Unclassified                        | 6 (0.3)         | 14 (0.4)        | 11 (0.2)        | 12 (0.2)        | 16 (0.5)        | 4 (0.2)         |        |
| A                                   | 191 (8.9)       | 231 (7.2)       | 398 (7.4)       | 342 (6.4)       | 202 (6.3)       | 125 (5.8)       |        |
| B                                   | 800 (37.2)      | 1204 (37.6)     | 1929 (36.0)     | 1904 (35.6)     | 1170 (36.4)     | 773 (36.0)      |        |
| C1D                                 | 379 (17.6)      | 549 (17.1)      | 890 (16.6)      | 866 (16.2)      | 510 (15.9)      | 339 (15.8)      |        |
| C2D                                 | 457 (21.2)      | 716 (22.4)      | 1227 (22.9)     | 1246 (23.3)     | 757 (23.5)      | 526 (24.5)      |        |
| E                                   | 269 (12.5)      | 386 (12.1)      | 711 (13.3)      | 773 (14.4)      | 439 (13.6)      | 305 (14.2)      |        |
| F                                   | 51 (2.4)        | 102 (3.2)       | 188 (3.5)       | 209 (3.9)       | 123 (3.8)       | 78 (3.6)        |        |
| Plasma Vitamin C [µmol/L]           | 55.48 (21.43)   | 54.09 (20.33)   | 53.52 (20.34)   | 52.82 (19.91)   | 51.76 (19.95)   | 52.02 (19.38)   | <0.001 |
| Tea intake (7DD) [g/d]              | 640.34 (524.62) | 734.64 (544.88) | 779.40 (524.49) | 807.05 (525.18) | 820.27 (511.60) | 813.27 (514.15) | <0.001 |
| Coffee intake (7DD) [g/d]           | 521.48 (516.12) | 426.34 (424.40) | 390.61 (403.83) | 365.46 (385.62) | 350.70 (369.21) | 336.45 (377.92) | <0.001 |
| gVLM_ [µmol/L]                      | 0.06 (0.06)     | 0.47 (0.19)     | 1.83 (0.69)     | 6.11 (2.03)     | 16.48 (4.43)    | 49.68 (21.30)   | <0.001 |
| gVLM (adjusted by specific gravity) | 0.06 (0.06)     | 0.47 (0.19)     | 1.80 (0.68)     | 6.01 (1.99)     | 16.17 (4.34)    | 48.66 (20.83)   | <0.001 |
| SREM_ [µmol/L]                      | 0.62 (1.24)     | 1.01 (1.84)     | 1.45 (2.25)     | 1.97 (2.76)     | 2.83 (3.51)     | 4.21 (4.41)     | <0.001 |
| SREM (adjusted by specific gravity) | 0.61 (1.22)     | 1.00 (1.80)     | 1.42 (2.21)     | 1.93 (2.70)     | 2.77 (3.43)     | 4.12 (4.31)     | <0.001 |

3

4

5  
6  
7  
8  
9

Supplemental Table 3: **Associations between biomarker-estimated flavan-3-ol intake and CVD risk markers, comparison of full dataset and complete cases (CC) analysis.** Data shown are estimated differences (95% CI) between low (10<sup>th</sup> centile) and high (90<sup>th</sup> centile) of estimated, using different statistical models<sup>†</sup>.

|                         | Men               |                   |                   |                   | Women <sup>‡</sup> |                   |                   |                   |
|-------------------------|-------------------|-------------------|-------------------|-------------------|--------------------|-------------------|-------------------|-------------------|
|                         | Systol            |                   | Diastol           |                   | Systol             |                   | Diastol           |                   |
|                         | Full dataset      | CC                | Full dataset      | CC                | Full dataset       | CC                | Full dataset      | CC                |
| <b>gVLM<sup>†</sup></b> |                   |                   |                   |                   |                    |                   |                   |                   |
| Model 0                 | -1.6 (-2.4; -0.8) | -1.6 (-2.5; -0.7) | -1.0 (-1.5; -0.4) | -1.0 (-1.6; -0.5) | -1.8 (-2.5; -1.0)  | -1.8 (-2.6; -1.0) | -1.1 (-1.6; -0.6) | -1.1 (-1.7; -0.6) |
| Model 1                 | -1.8 (-2.6; -1.0) | -1.8 (-2.7; -0.9) | -1.2 (-1.7; -0.7) | -1.2 (-1.8; -0.6) | -2.2 (-3.0; -1.5)  | -2.2 (-3.1; -1.4) | -1.4 (-1.9; -0.9) | -1.5 (-2.0; -0.9) |
| Model 2                 | -1.8 (-2.7; -1.0) | -1.8 (-2.7; -0.9) | -1.2 (-1.7; -0.6) | -1.2 (-1.8; -0.6) | -2.3 (-3.0; -1.5)  | -2.3 (-3.1; -1.5) | -1.4 (-1.9; -0.9) | -1.5 (-2.0; -1.0) |
| Model 3                 | -2.0 (-2.8; -1.2) | -1.9 (-2.8; -1.0) | -1.3 (-1.8; -0.7) | -1.3 (-1.9; -0.7) | -2.6 (-3.3; -1.8)  | -2.5 (-3.4; -1.7) | -1.6 (-2.0; -1.1) | -1.6 (-2.1; -1.1) |
| Model 4                 | -1.8 (-2.6; -1.0) | -1.8 (-2.7; -0.9) | -1.2 (-1.7; -0.7) | -1.2 (-1.8; -0.6) | -2.3 (-3.0; -1.5)  | -2.2 (-3.1; -1.4) | -1.4 (-1.9; -0.9) | -1.5 (-2.0; -1.0) |
| Model 5                 | -1.9 (-2.7; -1.1) | -1.9 (-2.8; -1.0) | -1.3 (-1.8; -0.7) | -1.3 (-1.9; -0.7) | -2.5 (-3.3; -1.8)  | -2.5 (-3.3; -1.6) | -1.6 (-2.0; -1.1) | -1.6 (-2.1; -1.1) |
| <b>SREM<sup>†</sup></b> |                   |                   |                   |                   |                    |                   |                   |                   |
| Model 0                 | -1.8 (-2.6; -0.9) | -1.5 (-2.4; -0.6) | -0.7 (-1.3; -0.2) | -0.6 (-1.2; 0.0)  | -1.3 (-2.1; -0.5)  | -1.4 (-2.2; -0.5) | -0.3 (-0.8; 0.2)  | -0.3 (-0.9; 0.2)  |
| Model 1                 | -2.0 (-2.8; -1.2) | -1.7 (-2.6; -0.8) | -0.9 (-1.4; -0.4) | -0.8 (-1.4; -0.2) | -1.9 (-2.7; -1.1)  | -1.9 (-2.8; -1.1) | -0.8 (-1.2; -0.3) | -0.7 (-1.3; -0.2) |
| Model 2                 | -2.1 (-2.9; -1.2) | -1.8 (-2.7; -0.9) | -0.9 (-1.4; -0.4) | -0.8 (-1.4; -0.2) | -2.0 (-2.7; -1.2)  | -2.0 (-2.9; -1.2) | -0.8 (-1.3; -0.3) | -0.8 (-1.3; -0.2) |
| Model 3                 | -2.5 (-3.3; -1.6) | -2.3 (-3.3; -1.4) | -1.2 (-1.7; -0.6) | -1.1 (-1.8; -0.5) | -2.9 (-3.7; -2.1)  | -2.8 (-3.7; -1.9) | -1.2 (-1.7; -0.7) | -1.1 (-1.7; -0.5) |
| Model 4                 | -2.0 (-2.8; -1.2) | -1.8 (-2.7; -0.9) | -0.9 (-1.4; -0.4) | -0.8 (-1.4; -0.2) | -1.9 (-2.7; -1.1)  | -2.0 (-2.8; -1.1) | -0.8 (-1.3; -0.3) | -0.8 (-1.3; -0.2) |
| Model 5                 | -2.4 (-3.3; -1.5) | -2.3 (-3.2; -1.3) | -1.2 (-1.7; -0.6) | -1.1 (-1.8; -0.5) | -2.8 (-3.6; -2.0)  | -2.7 (-3.6; -1.8) | -1.2 (-1.7; -0.6) | -1.1 (-1.7; -0.5) |

10  
11  
12  
13  
14  
15  
16  
17

<sup>†</sup>) Model 0: adjusted for age; model 1: additionally adjusted for BMI; model 2: additionally adjusted for smoking status, physical activity and social class; model 3: additionally adjusted plasma vitamin C as marker of fruit and vegetable intake, tea and coffee intake; model 4: model 2, additionally adjusted for baseline health (self-reported diabetes mellitus, myocardial infarction, cerebrovascular accident), family history of myocardial infarction, use of anti-hypertensive or lipid-lowering drugs; model 5: model 3, additionally adjusted for baseline health (self-reported diabetes mellitus, myocardial infarction, cerebrovascular accident), family history of myocardial infarction, use of anti-hypertensive or lipid-lowering drugs. <sup>‡</sup>) additionally adjusted for menopausal status and hormone replacement therapy; <sup>¶</sup>) biomarker concentrations were adjusted by specific gravity

18  
19  
20  
21

Supplemental Table 4: **Associations between biomarker-estimated flavan-3-ol intake and CVD risk markers, comparison of full dataset and complete cases (CC) analysis.** Data shown are estimated differences (95% CI) between low (10<sup>th</sup> centile) and high (90<sup>th</sup> centile) of estimated intake, using different statistical models<sup>†</sup>

|                   | Cholesterol       |                   | HDL             |                 | LDL               |                   | Triglycerides  |                | CRP              |                  |
|-------------------|-------------------|-------------------|-----------------|-----------------|-------------------|-------------------|----------------|----------------|------------------|------------------|
|                   | Full dataset      | CC                | Full dataset    | CC              | Full dataset      | CC                | Full dataset   | CC             | Full dataset     | CC               |
| <b>Men</b>        |                   |                   |                 |                 |                   |                   |                |                |                  |                  |
| gVLM <sup>†</sup> |                   |                   |                 |                 |                   |                   |                |                |                  |                  |
| Model 0           | -0.1 (-0.1; 0.0)  | -0.1 (-0.1; 0.0)  | 0.0 (0.0; 0.0)  | 0.0 (0.0; 0.0)  | -0.1 (-0.1; 0.0)  | -0.1 (-0.1; 0.0)  | 0.1 (0.0; 0.1) | 0.1 (0.0; 0.1) | -0.1 (-0.5; 0.2) | -0.1 (-0.4; 0.2) |
| Model 1           | -0.1 (-0.1; 0.0)  | -0.1 (-0.1; 0.0)  | 0.0 (0.0; 0.0)  | 0.0 (0.0; 0.0)  | -0.1 (-0.1; 0.0)  | -0.1 (-0.1; 0.0)  | 0.1 (0.0; 0.1) | 0.1 (0.0; 0.1) | -0.2 (-0.5; 0.2) | -0.1 (-0.4; 0.2) |
| Model 2           | -0.1 (-0.1; 0.0)  | -0.1 (-0.1; 0.0)  | 0.0 (0.0; 0.0)  | 0.0 (0.0; 0.0)  | -0.1 (-0.1; 0.0)  | -0.1 (-0.1; 0.0)  | 0.1 (0.0; 0.1) | 0.1 (0.0; 0.1) | -0.2 (-0.5; 0.1) | -0.2 (-0.5; 0.1) |
| Model 3           | -0.1 (-0.1; 0.0)  | -0.1 (-0.1; 0.0)  | 0.0 (0.0; 0.0)  | 0.0 (0.0; 0.0)  | -0.1 (-0.1; 0.0)  | -0.1 (-0.1; 0.0)  | 0.0 (0.0; 0.1) | 0.0 (0.0; 0.1) | -0.2 (-0.6; 0.1) | -0.2 (-0.5; 0.1) |
| Model 4           | -0.1 (-0.1; 0.0)  | -0.1 (-0.1; 0.0)  | 0.0 (0.0; 0.0)  | 0.0 (0.0; 0.0)  | -0.1 (-0.1; 0.0)  | -0.1 (-0.1; 0.0)  | 0.1 (0.0; 0.1) | 0.1 (0.0; 0.1) | -0.2 (-0.5; 0.2) | -0.2 (-0.5; 0.1) |
| Model 5           | -0.1 (-0.1; 0.0)  | -0.1 (-0.1; 0.0)  | 0.0 (0.0; 0.0)  | 0.0 (0.0; 0.0)  | -0.1 (-0.1; 0.0)  | -0.1 (-0.1; 0.0)  | 0.1 (0.0; 0.1) | 0.1 (0.0; 0.1) | -0.2 (-0.5; 0.1) | -0.2 (-0.5; 0.1) |
| SREM <sup>†</sup> |                   |                   |                 |                 |                   |                   |                |                |                  |                  |
| Model 0           | -0.1 (-0.2; -0.1) | -0.1 (-0.2; -0.1) | 0.0 (0.0; 0.0)  | 0.0 (0.0; 0.0)  | -0.2 (-0.2; -0.1) | -0.2 (-0.2; -0.1) | 0.1 (0.1; 0.2) | 0.1 (0.1; 0.2) | 0.2 (-0.2; 0.5)  | 0.3 (0.0; 0.6)   |
| Model 1           | -0.1 (-0.2; -0.1) | -0.1 (-0.2; -0.1) | 0.0 (0.0; 0.0)  | 0.0 (0.0; 0.0)  | -0.2 (-0.2; -0.1) | -0.2 (-0.2; -0.1) | 0.1 (0.1; 0.2) | 0.1 (0.1; 0.2) | 0.1 (-0.2; 0.5)  | 0.2 (-0.1; 0.5)  |
| Model 2           | -0.1 (-0.2; -0.1) | -0.1 (-0.2; -0.1) | 0.0 (0.0; 0.0)  | 0.0 (0.0; 0.0)  | -0.2 (-0.2; -0.1) | -0.2 (-0.2; -0.1) | 0.1 (0.1; 0.2) | 0.1 (0.1; 0.2) | 0.1 (-0.3; 0.4)  | 0.2 (-0.1; 0.5)  |
| Model 3           | -0.1 (-0.1; 0.0)  | -0.1 (-0.2; 0.0)  | 0.0 (0.0; 0.0)  | 0.0 (0.0; 0.0)  | -0.1 (-0.2; -0.1) | -0.2 (-0.2; -0.1) | 0.1 (0.0; 0.2) | 0.1 (0.0; 0.2) | 0.0 (-0.4; 0.3)  | 0.1 (-0.2; 0.4)  |
| Model 4           | -0.1 (-0.2; -0.1) | -0.1 (-0.2; -0.1) | 0.0 (0.0; 0.0)  | 0.0 (0.0; 0.0)  | -0.2 (-0.2; -0.1) | -0.2 (-0.2; -0.1) | 0.1 (0.1; 0.2) | 0.1 (0.1; 0.2) | 0.1 (-0.3; 0.4)  | 0.2 (-0.1; 0.5)  |
| Model 5           | -0.1 (-0.1; 0.0)  | -0.1 (-0.2; 0.0)  | 0.0 (0.0; 0.0)  | 0.0 (0.0; 0.0)  | -0.1 (-0.2; -0.1) | -0.2 (-0.2; -0.1) | 0.1 (0.1; 0.2) | 0.1 (0.1; 0.2) | 0.0 (-0.3; 0.4)  | 0.1 (-0.2; 0.5)  |
| <b>Women‡</b>     |                   |                   |                 |                 |                   |                   |                |                |                  |                  |
| gVLM <sup>†</sup> |                   |                   |                 |                 |                   |                   |                |                |                  |                  |
| Model 0           | -0.1 (-0.1; 0.0)  | -0.1 (-0.1; 0.0)  | 0.0 (-0.1; 0.0) | 0.0 (-0.1; 0.0) | -0.1 (-0.1; 0.0)  | -0.1 (-0.1; 0.0)  | 0.1 (0.1; 0.2) | 0.1 (0.1; 0.2) | 0.3 (0.0; 0.6)   | 0.3 (0.0; 0.7)   |
| Model 1           | -0.1 (-0.1; 0.0)  | -0.1 (-0.1; 0.0)  | 0.0 (0.0; 0.0)  | 0.0 (0.0; 0.0)  | -0.1 (-0.1; 0.0)  | -0.1 (-0.1; 0.0)  | 0.1 (0.0; 0.1) | 0.1 (0.0; 0.1) | 0.2 (-0.1; 0.5)  | 0.2 (-0.2; 0.5)  |
| Model 2           | -0.1 (-0.1; 0.0)  | -0.1 (-0.1; 0.0)  | 0.0 (0.0; 0.0)  | 0.0 (0.0; 0.0)  | -0.1 (-0.1; 0.0)  | -0.1 (-0.1; 0.0)  | 0.1 (0.0; 0.1) | 0.1 (0.0; 0.1) | 0.2 (-0.1; 0.5)  | 0.2 (-0.2; 0.5)  |
| Model 3           | -0.1 (-0.1; 0.0)  | -0.1 (-0.1; 0.0)  | 0.0 (0.0; 0.0)  | 0.0 (0.0; 0.0)  | -0.1 (-0.1; 0.0)  | -0.1 (-0.1; 0.0)  | 0.1 (0.0; 0.1) | 0.1 (0.0; 0.1) | 0.1 (-0.2; 0.4)  | 0.1 (-0.2; 0.5)  |
| Model 4           | -0.1 (-0.1; 0.0)  | -0.1 (-0.1; 0.0)  | 0.0 (0.0; 0.0)  | 0.0 (0.0; 0.0)  | -0.1 (-0.1; 0.0)  | -0.1 (-0.1; 0.0)  | 0.1 (0.0; 0.1) | 0.1 (0.0; 0.1) | 0.2 (-0.1; 0.5)  | 0.2 (-0.1; 0.6)  |
| Model 5           | -0.1 (-0.1; 0.0)  | -0.1 (-0.1; 0.0)  | 0.0 (0.0; 0.0)  | 0.0 (0.0; 0.0)  | -0.1 (-0.1; 0.0)  | -0.1 (-0.1; 0.0)  | 0.1 (0.0; 0.1) | 0.1 (0.0; 0.1) | 0.1 (-0.2; 0.4)  | 0.1 (-0.2; 0.5)  |
| SREM <sup>†</sup> |                   |                   |                 |                 |                   |                   |                |                |                  |                  |
| Model 0           | 0.0 (-0.1; 0.1)   | 0.0 (0.0; 0.1)    | 0.0 (0.0; 0.0)  | 0.0 (0.0; 0.0)  | 0.0 (-0.1; 0.0)   | 0.0 (-0.1; 0.0)   | 0.2 (0.1; 0.2) | 0.2 (0.1; 0.2) | 0.4 (0.1; 0.7)   | 0.5 (0.1; 0.8)   |
| Model 1           | 0.0 (-0.1; 0.0)   | 0.0 (-0.1; 0.0)   | 0.0 (0.0; 0.0)  | 0.0 (0.0; 0.0)  | -0.1 (-0.1; 0.0)  | -0.1 (-0.1; 0.0)  | 0.1 (0.1; 0.2) | 0.1 (0.1; 0.2) | 0.3 (0.0; 0.6)   | 0.3 (0.0; 0.7)   |
| Model 2           | 0.0 (-0.1; 0.0)   | 0.0 (-0.1; 0.0)   | 0.0 (0.0; 0.0)  | 0.0 (0.0; 0.0)  | -0.1 (-0.1; 0.0)  | -0.1 (-0.1; 0.0)  | 0.1 (0.1; 0.2) | 0.1 (0.1; 0.2) | 0.3 (0.0; 0.6)   | 0.3 (0.0; 0.7)   |
| Model 3           | 0.0 (-0.1; 0.1)   | 0.0 (-0.1; 0.1)   | 0.0 (0.0; 0.0)  | 0.0 (0.0; 0.0)  | -0.1 (-0.1; 0.0)  | -0.1 (-0.1; 0.0)  | 0.1 (0.1; 0.1) | 0.1 (0.1; 0.2) | 0.1 (-0.3; 0.4)  | 0.1 (-0.3; 0.5)  |
| Model 4           | 0.0 (-0.1; 0.0)   | 0.0 (-0.1; 0.0)   | 0.0 (0.0; 0.0)  | 0.0 (0.0; 0.0)  | -0.1 (-0.1; 0.0)  | -0.1 (-0.1; 0.0)  | 0.1 (0.1; 0.2) | 0.1 (0.1; 0.2) | 0.3 (0.0; 0.6)   | 0.3 (0.0; 0.7)   |
| Model 5           | 0.0 (-0.1; 0.1)   | 0.0 (-0.1; 0.1)   | 0.0 (0.0; 0.0)  | 0.0 (0.0; 0.0)  | -0.1 (-0.1; 0.0)  | -0.1 (-0.1; 0.0)  | 0.1 (0.1; 0.1) | 0.1 (0.1; 0.2) | 0.1 (-0.2; 0.4)  | 0.1 (-0.3; 0.5)  |

22  
23  
24  
25  
26  
27  
28  
29

<sup>†</sup>) Model 0: adjusted for age; model 1: additionally adjusted for BMI; model 2: additionally adjusted for smoking status, physical activity and social class; model 3: additionally adjusted plasma vitamin C as marker of fruit and vegetable intake, tea and coffee intake; model 4: model 2, additionally adjusted for baseline health (self-reported diabetes mellitus, myocardial infarction, cerebrovascular accident), family history of myocardial infarction, use of anti-hypertensive or lipid-lowering drugs; model 5: model 3, additionally adjusted for baseline health (self-reported diabetes mellitus, myocardial infarction, cerebrovascular accident), family history of myocardial infarction, use of anti-hypertensive or lipid-lowering drugs. <sup>‡</sup>) additionally adjusted for menopausal status and hormone replacement therapy; <sup>¶</sup>) biomarker concentrations were adjusted by specific gravity
